# Supplementary material for: Synthesis of hex nut shaped Au–Ag nanostructures via a galvanic replacement reaction and their optical properties
Source: Royal Society of Chemistry journal article supplement (doi:10.1039/c3ce40652k), 2013-01-01
Supplement: c3ce40652k.pdf [file c3ce40652k.pdf]

## Synthesis of Hex Nut Shaped Au-Ag Nanostructures via a Galvanic Replacement Reaction and Their Optical Properties

Mun Ho Kim,<sup>a\*</sup> Jong-Jin Lee,<sup>a</sup> Sang-Hyuk Im<sup>b</sup>, Doo-Jin Byun,<sup>a</sup> Kil-Yeong Choi<sup>a\*</sup>

<sup>a</sup>Reliability Assessment Center for Chemical Materials, Korea Research Institute of Chemical Technology (KRICT), 141 Gajeong-ro, Yuseong-gu, Daejeon 305-600, Republic of Korea

<sup>b</sup>Department of Chemical Engineering, Kyung Hee University, Yongin-si, Kyunggi-do 446-701, Republic of Korea

### Supporting Figures

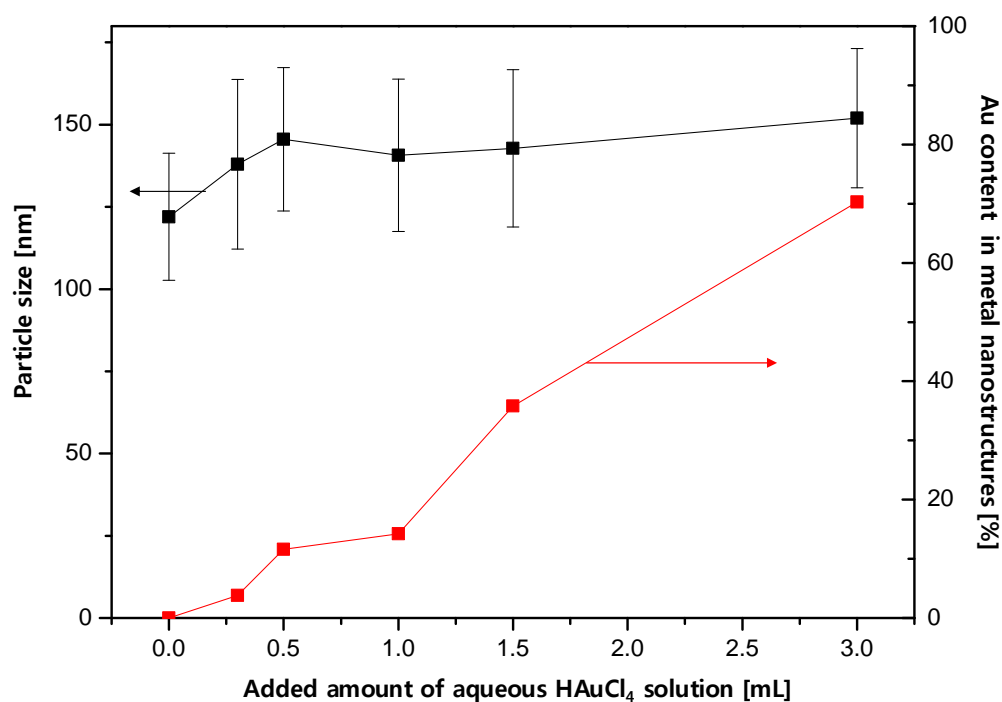

**Fig. S1** Plots of average particle sizes of Au-Ag nanostructures (black squares) and Au contents in the Au-Ag nanostructures (red squares) as a function of added amount of aqueous HAuCl<sub>4</sub> solution.

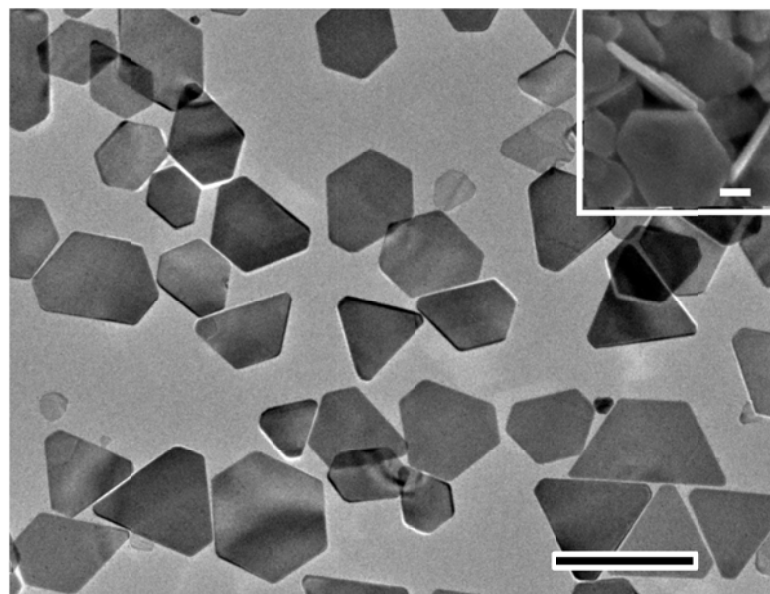

**Fig. S2** TEM images of thin Ag nanoplates used in the galvanic replacement reaction (scale bar = 400 nm). The inset is SEM image taken from samples in which the nanoplates were oriented vertically on the substrate (scale bar = 100 nm).

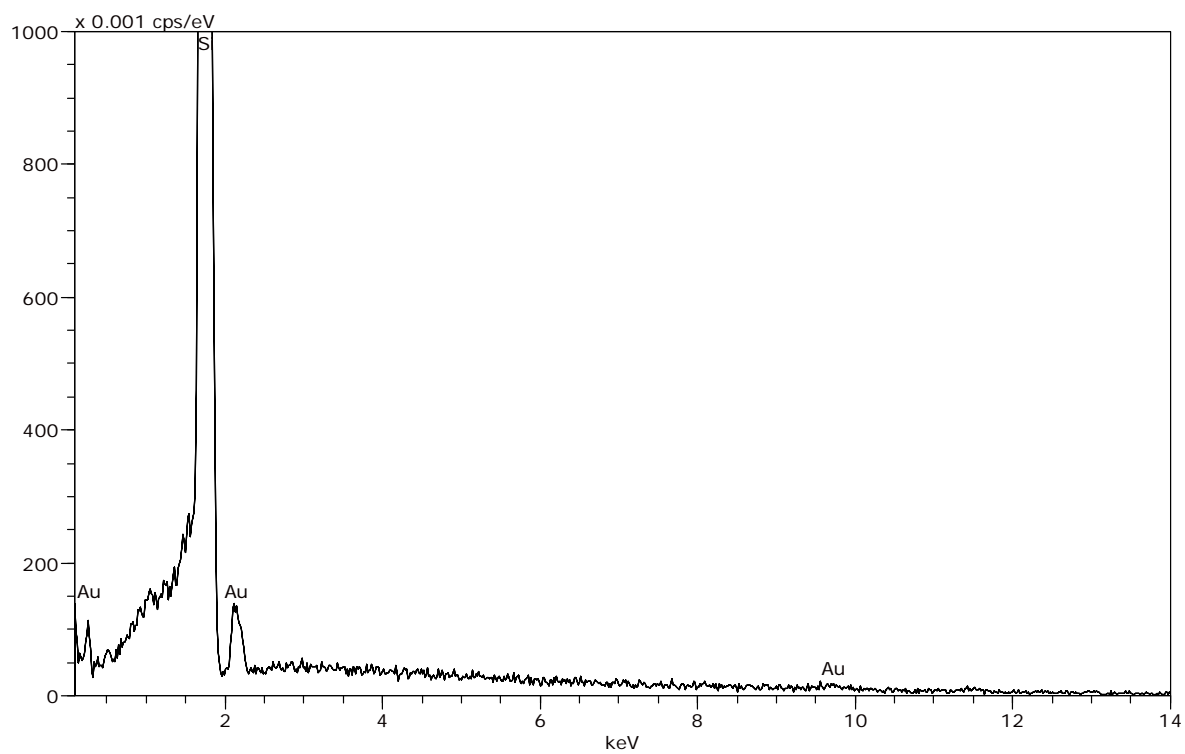

**Fig. S3** The EDX spectrum of highly porous Au nanostructures on a silicon wafer substrate.
